# Supplementary material for: Phenotypic and Molecular Characterization of Commensal, Community-Acquired and Nosocomial Klebsiella spp.
Source: MDPI journal article supplement (doi:10.3390/microorganisms9112344), 2021-11-12
Supplement: s1 [file s1]

**Table S1.** Oligonucleotides used in this study.

| Name                     | Sequence (5'-3')       | Target Gene (s)                                            | Reference  |
|--------------------------|------------------------|------------------------------------------------------------|------------|
| Identification/Phylogeny |                        |                                                            |            |
| KrpoB-for                | TTATGGACCAGAACAACC     | <i>rpoB</i> (β subunit of bacterial RNA polymerase)        | This study |
| KrpoB-rev                | AACGGGATCAGGGC         |                                                            |            |
| Antibiotic Resistance    |                        |                                                            |            |
| P1                       | ATGGTTAAAAAATCACTGCGCC | <i>blaCTX-M</i> (Extended-Spectrum β-lactamases)           | 24         |
| P2b                      | TCCCGACGGCTTTCCGCCTT   |                                                            |            |
| CTX-M-1G-F               | AAAAATCACTGCGCCAGTTC   | <i>blaCTX-M</i> (Extended-Spectrum β-lactamases)           | 23         |
| CTX-M-1G-R               | AGCTTATTCATCGCCACGTT   |                                                            |            |
| CTX-M-2G-F               | CGACGCTACCCCTGCTATT    |                                                            |            |
| CTX-M-2G-R               | CCAGCGTCAGATTTTTCAGG   |                                                            |            |
| CTX-M-9G-F               | CAAAGAGAGTGCAACGGATG   |                                                            |            |
| CTX-M-9G-R               | ATTGGAAAGCGTTCATCACC   |                                                            |            |
| Siderophores             |                        |                                                            |            |
| iutA-F                   | GATGCCGCGACCATAGTATT   | <i>iutA</i> (Aerobactin synthesis)                         |            |
| iutA-R                   | TGAGTCGTTGCGATTCTACC   |                                                            |            |
| iucB-F                   | TGTTACCAACCAGCAGATG    | <i>iutB</i> (Aerobactin receptor)                          |            |
| iucB-R                   | GTTACAGCGGATATGGACT    |                                                            |            |
| fepA-F                   | TACTTCTTCGGCTCCTGCTT   | <i>fepA</i> (Enterobactin synthesis)                       | This study |
| fepA-R                   | CAGCAACCAGTTCACGGATA   |                                                            |            |
| fepC-F                   | CTTGTTACCGCCTCTTCAT    | <i>fepC</i> (Enterobactin receptor)                        |            |
| fepC-R                   | TCACTTCACCGCCATTATCG   |                                                            |            |
| FyuA-F                   | CCTTCCGGTTCGTTAATCGT   | <i>iutA</i> (Yersibactin synthesis)                        |            |
| FyuA-R                   | GCCATAGCGCGTATCAATCA   |                                                            |            |
| YbtT-F                   | GTGACGCAATCTGCAATGTG   | <i>iutB</i> (Yersibactin receptor)                         |            |
| YbtT-R                   | ATCCGCCAATGTCTATCAGC   |                                                            |            |
| Virulence factors        |                        |                                                            |            |
| magA-F                   | GGTGCTCTTTACATCATTGC   | <i>magA</i> (hypermucoviscosity phenotype )                | 26         |
| magA-R                   | GCAATGGCCATTTGCGTTAG   |                                                            |            |
| rmpA-F                   | ACTGGGCTACCTCTGCTTCA   | <i>rmpA</i> (hypermucoviscosity phenotype )                | 27         |
| rmpA-R                   | CTTGCATGAGCCATCTTTCA   |                                                            |            |
| wabG-F                   | ACCATCGGCCATTTGATAGA   | <i>wabG</i> (lipopolysaccharide synthesis)                 |            |
| wabG-R                   | CGGGGCAGATCCATATC      |                                                            |            |
| uge-F                    | TCTTCACGCCTTCCTTCACT   | <i>uge</i> (uridine diphosphate galacturonate 4-epimerase) |            |
| uge-R                    | GATCATCCGGTCTCCCTGTA   |                                                            |            |
| kfuB-F1179               | GAAGTGACGCTGTTTCTGGC   | <i>kfu</i> (iron-uptake system)                            |            |
| kfuC-R649                | TTTCGTGTGGCCAGTGACTC   |                                                            |            |
| fimH-F                   | TGCTGCTGGGCTGGTCGATG   | <i>fimH</i> (type 1 fimbrial adhesin)                      |            |
| fimH-R                   | GGGAGGGTGACGGTGACATC   |                                                            |            |

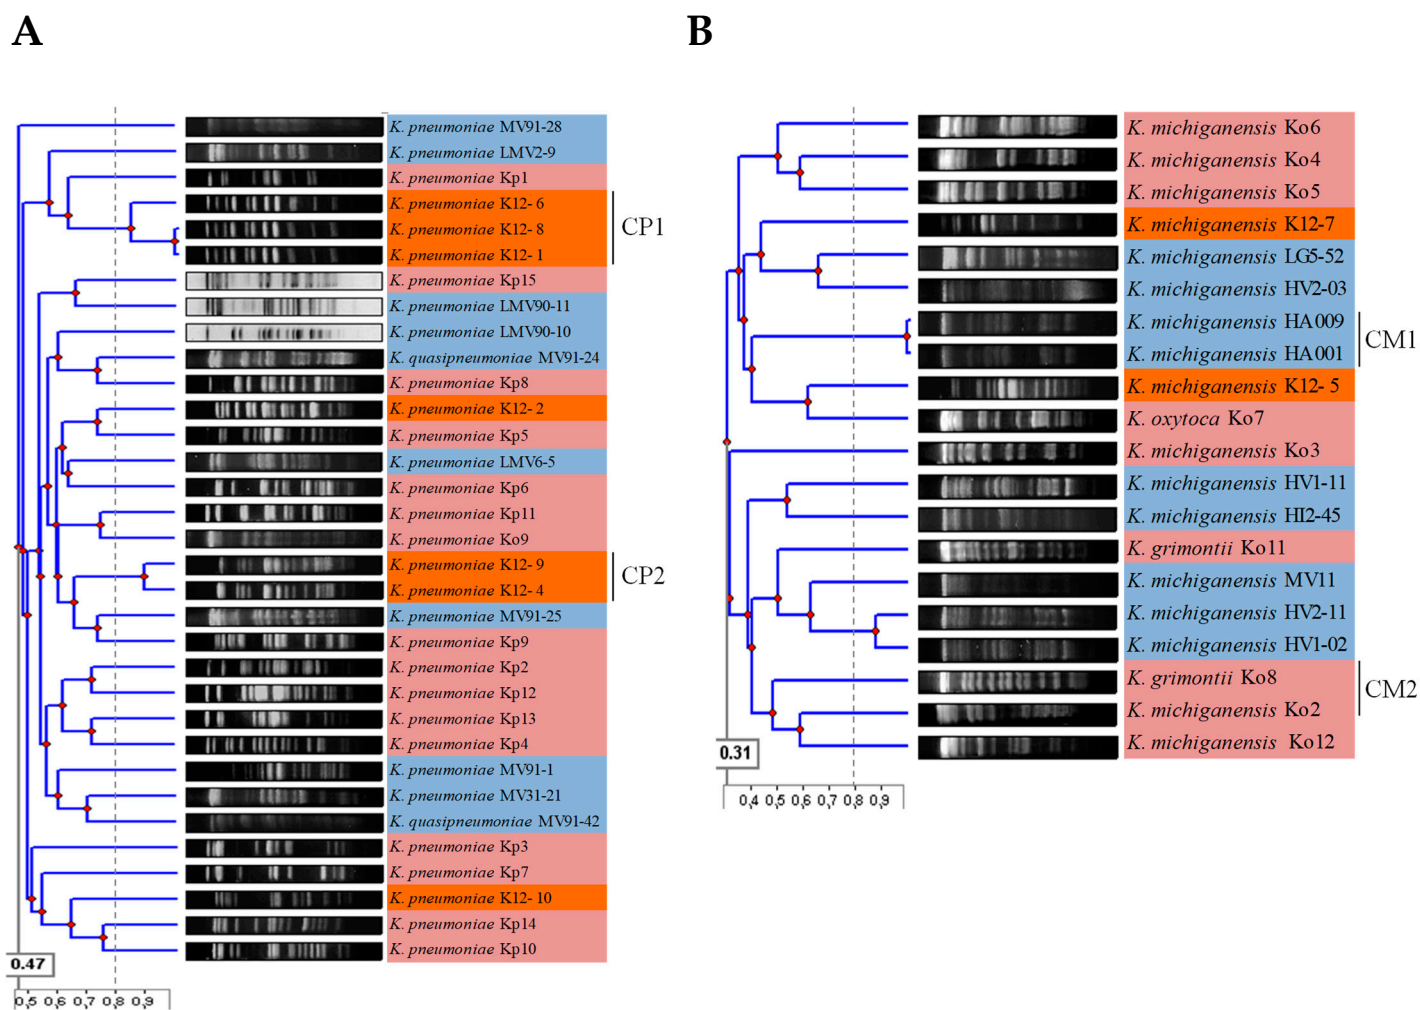

**Figure S1.** PFGE profiles of the isolates from the *K. pneumoniae* (A) and *K. oxytoca* complex (B).

A

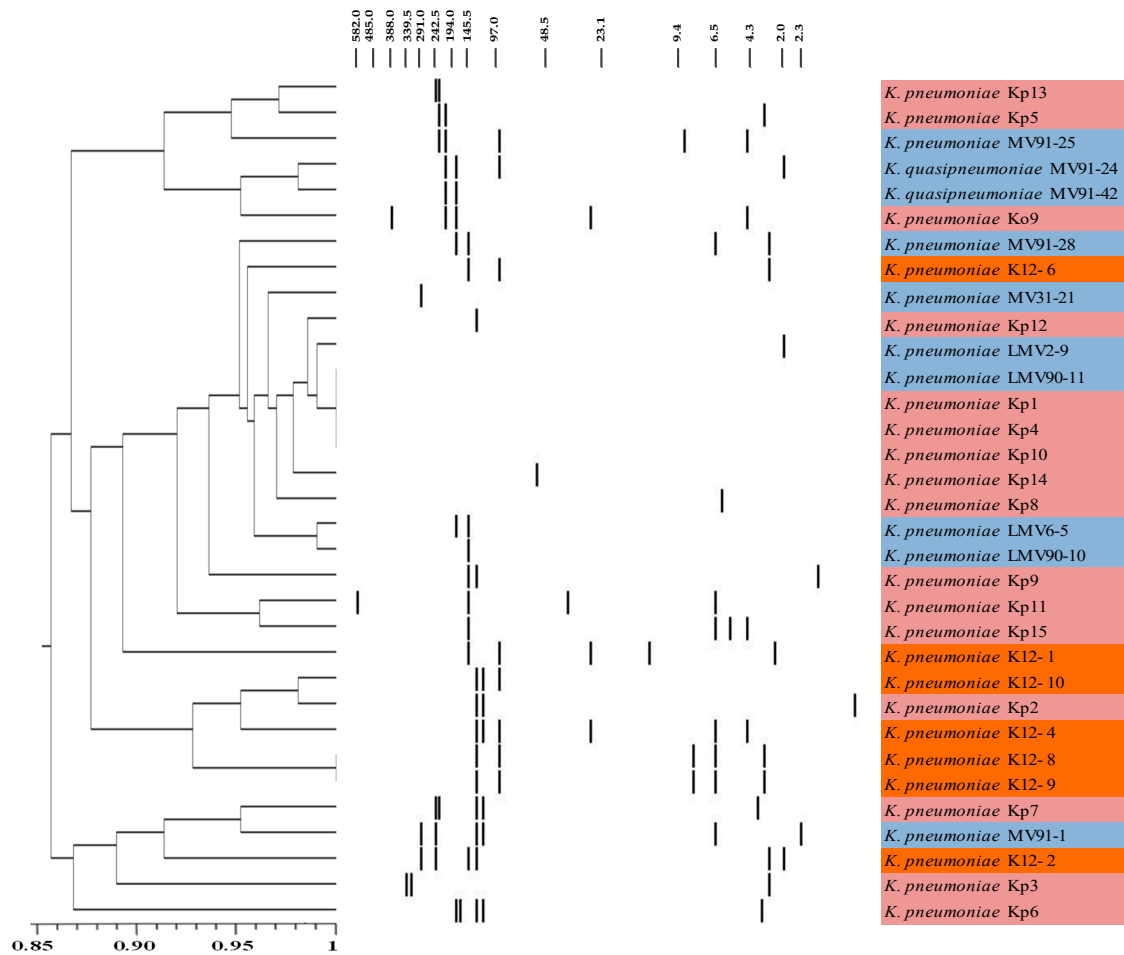

B

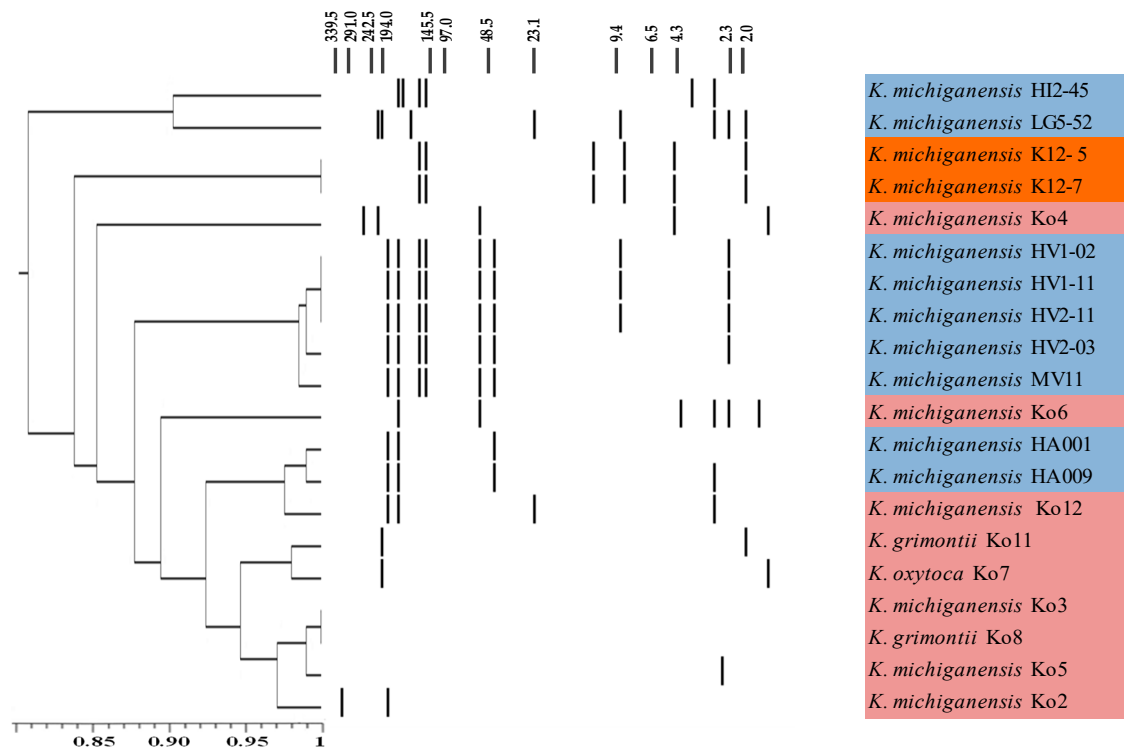

**Figure S2.** Plasmid profiles of isolates from *K. pneumoniae* (A) and *K. oxytoca* complex.
